# Supplementary material
Source: PubMed Central journal article supplement (PMC5085865)
Supplement: NIHMS818744-supplement-309402DR2_Acknowledgment_Permissions.pdf [file NIHMS818744-supplement-309402DR2_Acknowledgment_Permissions.pdf]

## Circulation Research

---

**From:** Fishbaugh, Justin <justin-fishbaugh@uiowa.edu>  
**Sent:** Friday, September 16, 2016 3:47 PM  
**To:** circulation.research@circresearch.com  
**Cc:** Harwani, Sailesh C; Hester, Angela M; Vignes, Heath M  
**Subject:** RE: CIRCRES/2016/309402DR1: Nicotine Mediates CD161a+ Renal Macrophage

I am acknowledged by name in "CIRCRES/2016/309402DR1: Nicotine Mediates CD161a+ Renal Macrophage" and I am giving my permission to be acknowledged in the publication of this manuscript.

Justin Fishbaugh  
Technical Director  
Flow Cytometry Facility  
Holden Comprehensive Cancer Center  
University of Iowa  
48 EMRB  
Iowa City, IA 52242  
(319) 335-8103 Tel  
<http://www.healthcare.uiowa.edu/corefacilities/flowcytometry/>

## Circulation Research

---

**From:** Hester, Angela M <angela-hester@uiowa.edu>  
**Sent:** Friday, September 16, 2016 3:20 PM  
**To:** circulation.research@circresearch.com  
**Subject:** FW: Circulation Research Decision on Ms # CIRCRES/2016/309402DR1  
**Attachments:** 309402DR1\_Decision\_1473870836\_1.pdf

Dear Circ Research Editorial Staff,

I am acknowledged in the above manuscript and have been advised that I need to write a letter that I give permission to acknowledge my help on the manuscript. I helped with editing of the manuscript in non-science edits only, as an administrative assistant.

Thank you,

Angela

*Angela Hester*

Administrative Services Coordinator  
Abboud Cardiovascular Research Center  
Internal Medicine/Cardiology Division  
Carver College of Medicine  
University of Iowa  
616 MRC  
T: 319-335-1206  
F: 319-335-6969

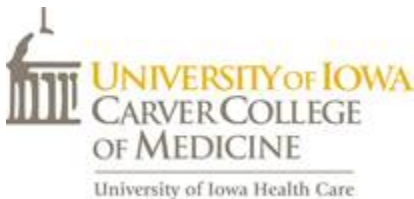

---

**From:** Hester, Angela M  
**Sent:** Friday, September 16, 2016 2:09 PM  
**To:** Hester, Angela M  
**Subject:** FW: Circulation Research Decision on Ms # CIRCRES/2016/309402DR1

---

**From:** [circulation.research@circresearch.com](mailto:circulation.research@circresearch.com) [<mailto:circulation.research@circresearch.com>]  
**Sent:** Wednesday, September 14, 2016 11:34 AM  
**To:** Harwani, Sailesh C  
**Cc:** Ratcliff, Jason A; [fayyaz.sutterwala@cshs.org](mailto:fayyaz.sutterwala@cshs.org); Ballas, Zuhair; Meyerholz, David K; Chapleau, Mark; Abboud, Francois; [sailsh.harwani@hotmail.com](mailto:sailsh.harwani@hotmail.com)  
**Subject:** Circulation Research Decision on Ms # CIRCRES/2016/309402DR1

## Circulation Research

---

**From:** Cicha, Michael Z <cicham@healthcare.uiowa.edu>  
**Sent:** Friday, September 16, 2016 3:09 PM  
**To:** circulation.research@circresearch.com  
**Subject:** RE: 309402DR1

I grant permission to be acknowledged in the following publication:

309402DR1

“Nicotine Mediates CD161a+ Renal Macrophage Infiltration and Pre-mature Hypertension in the Spontaneously Hypertensive Rat “

Michael Z. Cicha

---

Notice: This UI Health Care e-mail (including attachments) is covered by the Electronic Communications Privacy Act, 18 U.S.C. 2510-2521 and is intended only for the use of the individual or entity to which it is addressed, and may contain information that is privileged, confidential, and exempt from disclosure under applicable law. If you are not the intended recipient, any dissemination, distribution or copying of this communication is strictly prohibited. If you have received this communication in error, please notify the sender immediately and delete or destroy all copies of the original message and attachments thereto. Email sent to or from UI Health Care may be retained as required by law or regulation. Thank you.

---
